# Supplementary material for: Dual anticancer and antibacterial activity of fluorescent naphthoimidazolium salts
Source: Royal Society of Chemistry journal article supplement (doi:10.1039/d3ra06555c), 2023-01-01
Supplement: d3ra06555c1.pdf [file d3ra06555c1.pdf]

Supporting information of

**Dual anticancer and antibacterial activity of fluorescent NaphthoImidazolium salts**

---

Dung Ngoc Tran,<sup>a,‡</sup> Thi Thuy Hang Hoang,<sup>b,‡</sup> Sondavid Nandanwar,<sup>c</sup> Vuong Thi Thanh Xuan Ho,<sup>d</sup> Van Thong Pham,<sup>e</sup> Huy Duc Vu,<sup>f</sup> Xuan Ha Nguyen,<sup>g</sup> Huy trung Nguyen,<sup>h</sup> Trang Van Nguyen,<sup>h</sup> Thuy Kieu Van Nguyen,<sup>i</sup> Lam Dai Tran,<sup>h</sup> Myeongkee Park,<sup>j</sup> Songyi Lee,<sup>\*i,j</sup> Thanh Chung Pham,<sup>\*h</sup>

---

<sup>a.</sup> *Faculty of Chemistry, Hanoi National University of Education, Hanoi, Vietnam*

<sup>b.</sup> *Department of Chemistry, Soongsil University, Seoul 06978, South Korea.*

<sup>c.</sup> *Eco-friendly New Materials Research Center, Korea Research Institute of Chemical Technology, 141 Gajeong-ro, Yuseong-gu, Daejeon City, Republic of Korea*

<sup>d.</sup> *Faculty of Pharmacy, Dong A University, Danang, Vietnam*

<sup>e.</sup> *R&D Center, Vietnam Education and Technology transfer JSC, Cau Giay, Hanoi, Vietnam*

<sup>f.</sup> *Department of Radiology, School of Medicine, Daegu Catholic University, Daegu 42472, Korea*

<sup>g.</sup> *Institute of Natural Products Chemistry, Vietnam Academy of Science and Technology, 18 Hoang Quoc Viet, Cau Giay, Hanoi, Vietnam*

<sup>h.</sup> *Institute for Tropical Technology, Vietnam Academy of Science and Technology, 18 Hoang Quoc Viet, Cau Giay, Hanoi, Vietnam. Email: ptchung@itt.vast.vn*

<sup>i.</sup> *Industry 4.0 Convergence Bionics Engineering, Pukyong National University, Busan 48513, Korea. Email: slee@pknu.ac.kr*

<sup>j.</sup> *Department of Chemistry, Pukyong National University, Busan 48513, Korea*

<sup>k.</sup> *‡ These authors equally contributed to this work.*

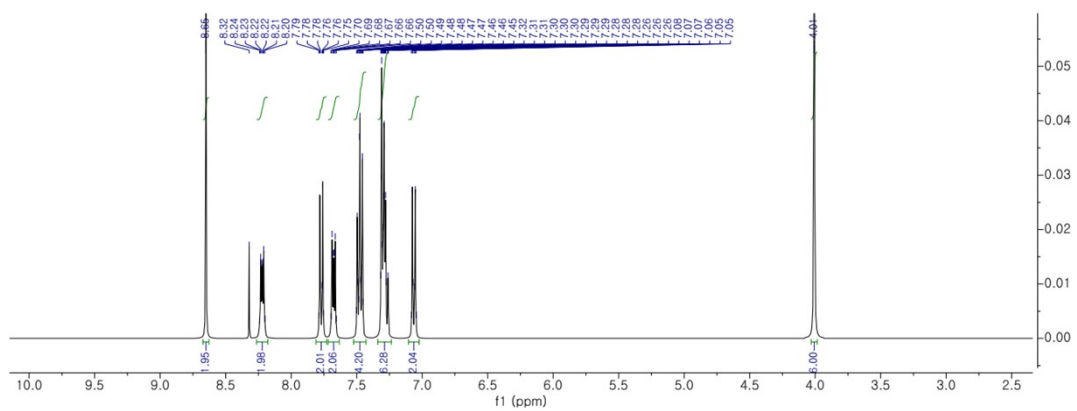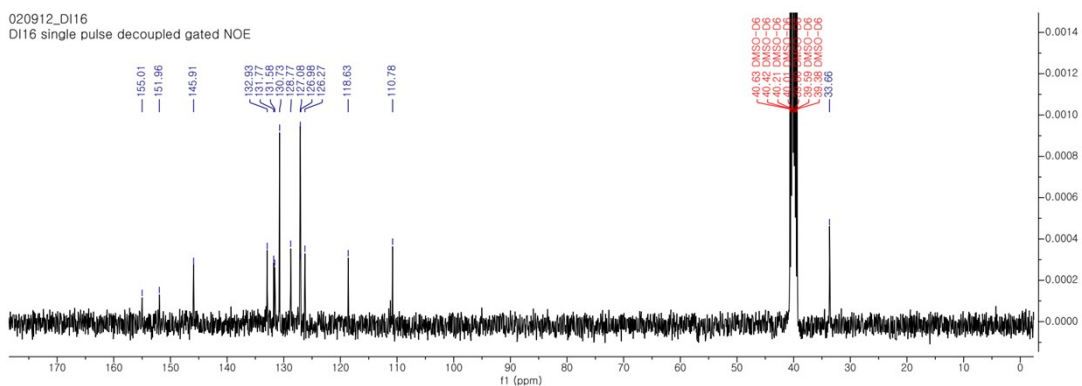

+MS, 1.5min #89

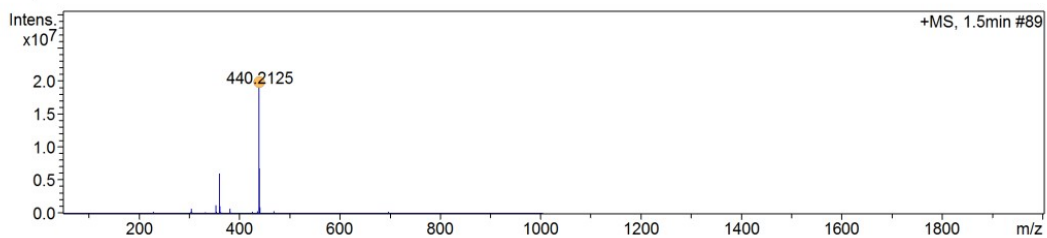

| Meas. m/z | # | Ion Formula                                    | m/z      | err [ppm] | mSigma | # mSigma | Score  | rdb  | e <sup>-</sup> Conf | N-Rule |
|-----------|---|------------------------------------------------|----------|-----------|--------|----------|--------|------|---------------------|--------|
| 440.2125  | 1 | C <sub>31</sub> H <sub>26</sub> N <sub>3</sub> | 440.2127 | 0.4       | 9.1    | 1        | 100.00 | 20.5 | even                | ok     |

Figure S1. <sup>1</sup>H-NMR, <sup>13</sup>C-NMR and HR-MS spectra of NI-TPA

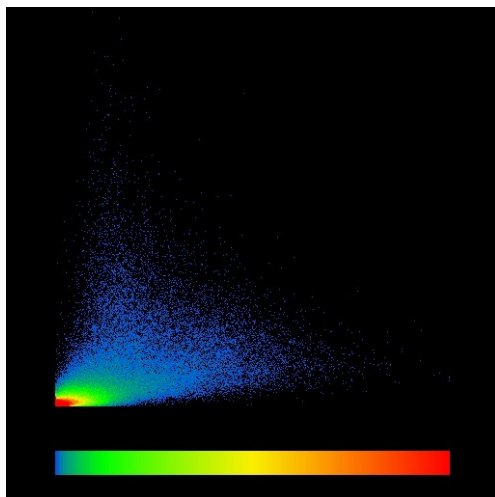

**Figure S2.** Colocalization analysis plot of the Lysotracker and NI-TPA.

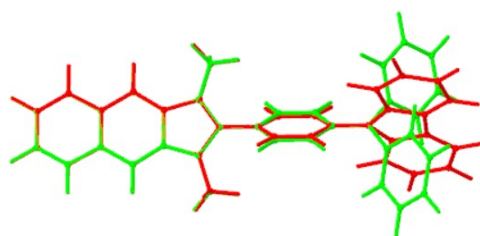

**Figure S3.** Merge  $S_0$  geometry of NI-Cbz (red) and NI-TPA (green)

**Table S1.** RMSD of the backbone protein, RMSD of the ligand, and Rg analysis for the MD simulations at different times.

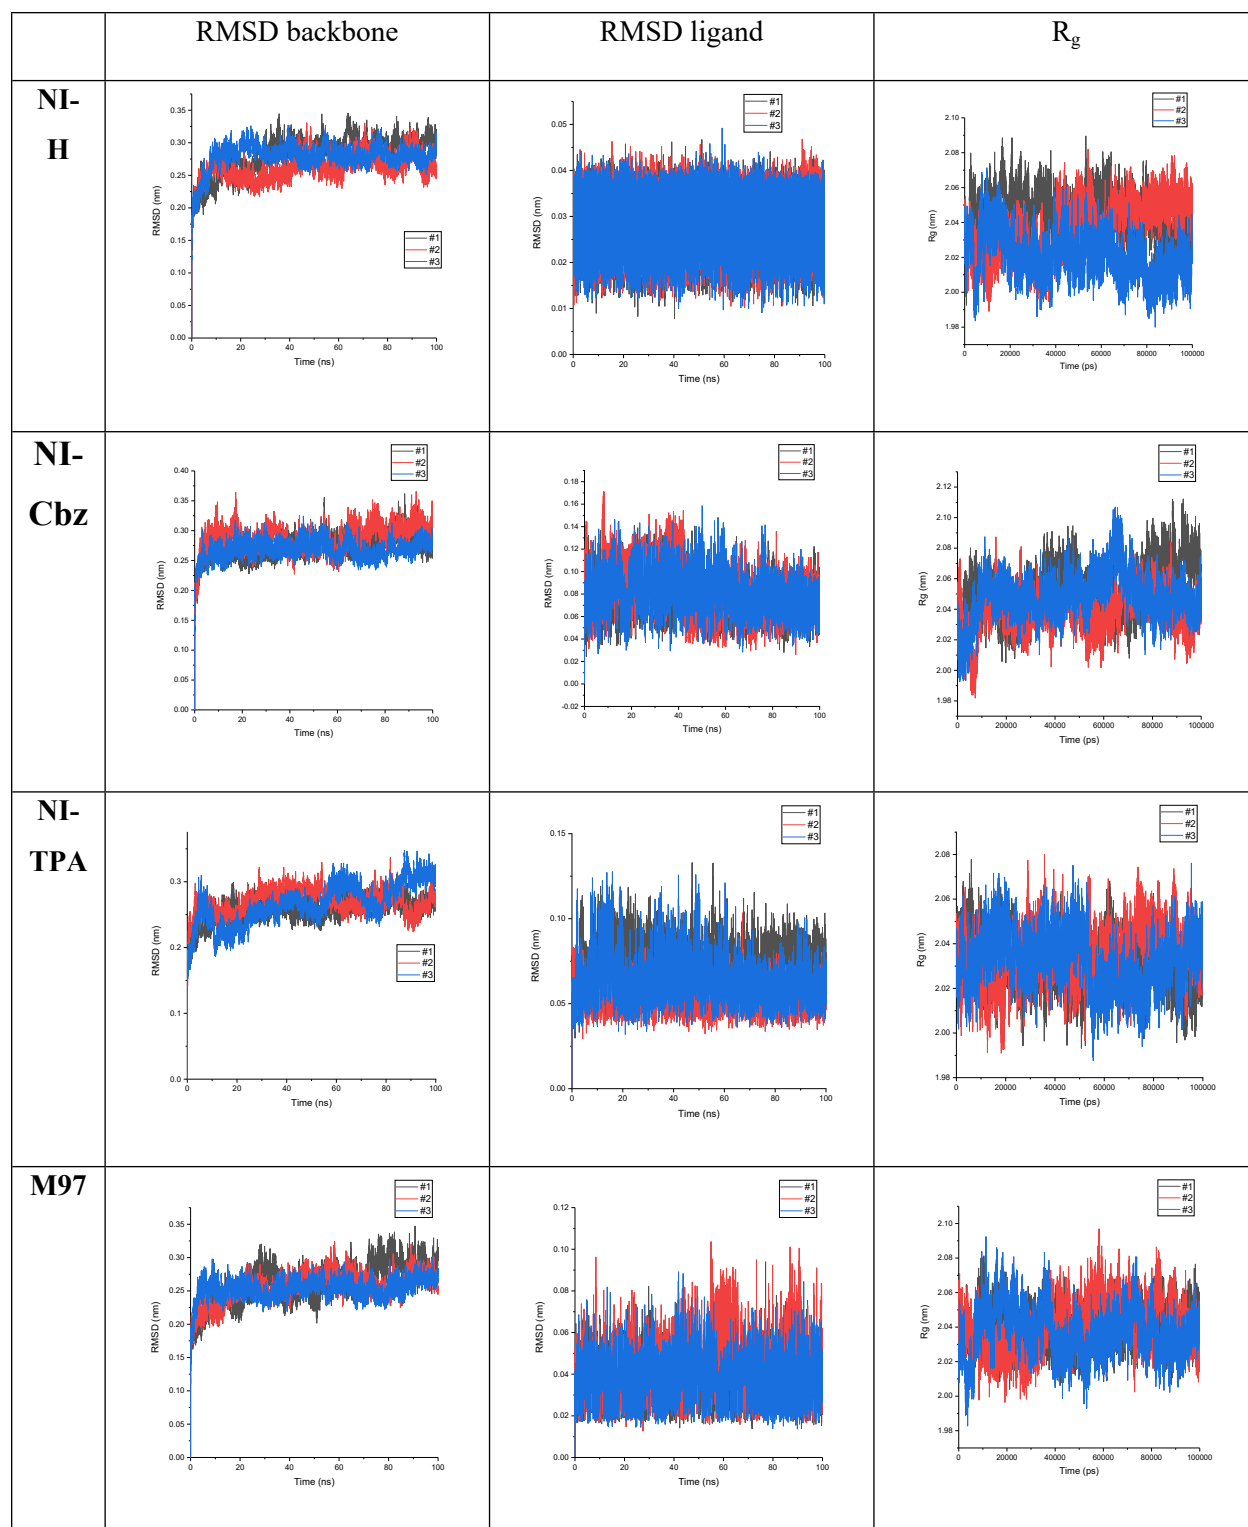

**Table S2.** Value of RMSD of the backbone protein, RMSD of the ligand, and Rg analysis for the MD simulations at different times and its average

|                                     | Time           | <b>NI-H</b>         | <b>NI-Cbz</b>      | <b>NI-TPA</b>      | <b>M97</b>         |
|-------------------------------------|----------------|---------------------|--------------------|--------------------|--------------------|
| Average<br>RMSD<br>backbone<br>(nm) | 1              | 0.280               | 0.271              | 0.258              | 0.261              |
|                                     | 2              | 0.262               | 0.288              | 0.269              | 0.255              |
|                                     | 3              | 0.278               | 0.268              | 0.266              | 0.253              |
|                                     | <b>Average</b> | <b>0.273±0.010</b>  | <b>0.276±0.011</b> | <b>0.264±0.006</b> | <b>0.256±0.004</b> |
| Average<br>RMSD<br>Ligand<br>(nm)   | 1              | 0.029               | 0.076              | 0.074              | 0.037              |
|                                     | 2              | 0.030               | 0.083              | 0.053              | 0.042              |
|                                     | 3              | 0.029               | 0.081              | 0.064              | 0.036              |
|                                     | <b>Average</b> | <b>0.029±0.0002</b> | <b>0.080±0.003</b> | <b>0.064±0.010</b> | <b>0.038±0.003</b> |
| Average<br>Rg<br>(nm)               | 1              | 2.044               | 2.053              | 2.030              | 2.041              |
|                                     | 2              | 2.037               | 2.039              | 2.035              | 2.040              |
|                                     | 3              | 2.021               | 2.049              | 2.032              | 2.037              |
|                                     | <b>Average</b> | <b>2.034±0.012</b>  | <b>2.047±0.007</b> | <b>2.032±0.002</b> | <b>2.039±0.002</b> |
